# Supplementary material for: Effect of H2S co-feeding on the performance of the Fe/SiO2 catalyst for isomerization and dehydrogenation of C5-monoolefin
Source: Royal Society of Chemistry journal article supplement (doi:10.1039/d3nj04923j), 2024-01-01

## *Supporting Information*

### **Effect of H<sub>2</sub>S co-feeding on the performance of Fe/SiO<sub>2</sub> catalyst for isomerization and dehydrogenation of C<sub>5</sub>-monoolefin**

Fumiya Karasawa<sup>a</sup>, Ryo Watanabe<sup>a,\*</sup>, Priyanka Verma<sup>b</sup>, Yuichi Miyagi<sup>c</sup>, Hikaru Yamada<sup>c</sup>, Setsuko Miyanari<sup>c</sup>, Choji Fukuhara<sup>a,\*</sup>

<sup>a</sup>*Department of Applied Chemistry and Biochemical Engineering, Graduate School of Engineering,*

<sup>b</sup>*Department of Chemistry, Indian Institute of Technology Delhi, Hauz Khas, New Delhi, 110016, India*

<sup>c</sup>*Research & Development Center, Fuel & Petrochemical Technology Group, Cosmo Oil Co., Ltd., 1134-2 Gongendo, Satte, Saitama 340-0193, Japan*

Figure S-1 N<sub>2</sub> adsorption-desorption isotherms of SiO<sub>2</sub> support.

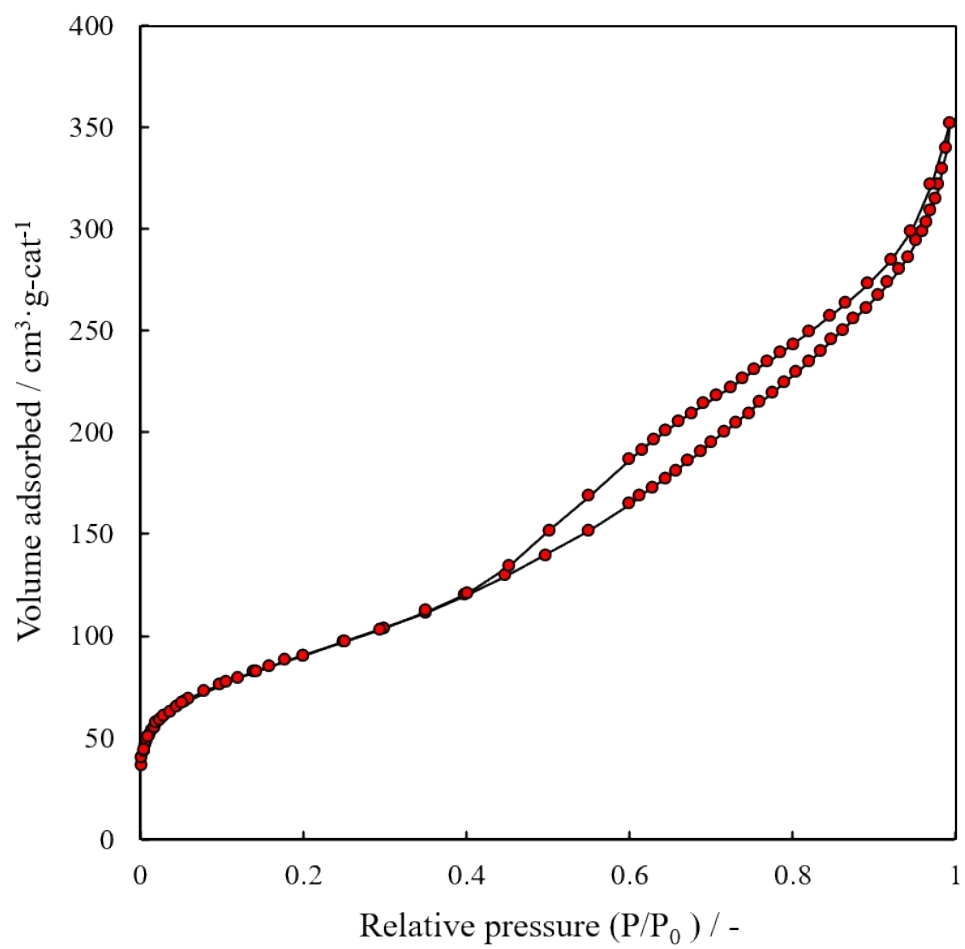

Figure S-2 STEM image and element maps of the (b) silicon (Si), (c) iron (Fe), and (d) oxygen (O) components in the as-made Fe/SiO<sub>2</sub> catalyst.

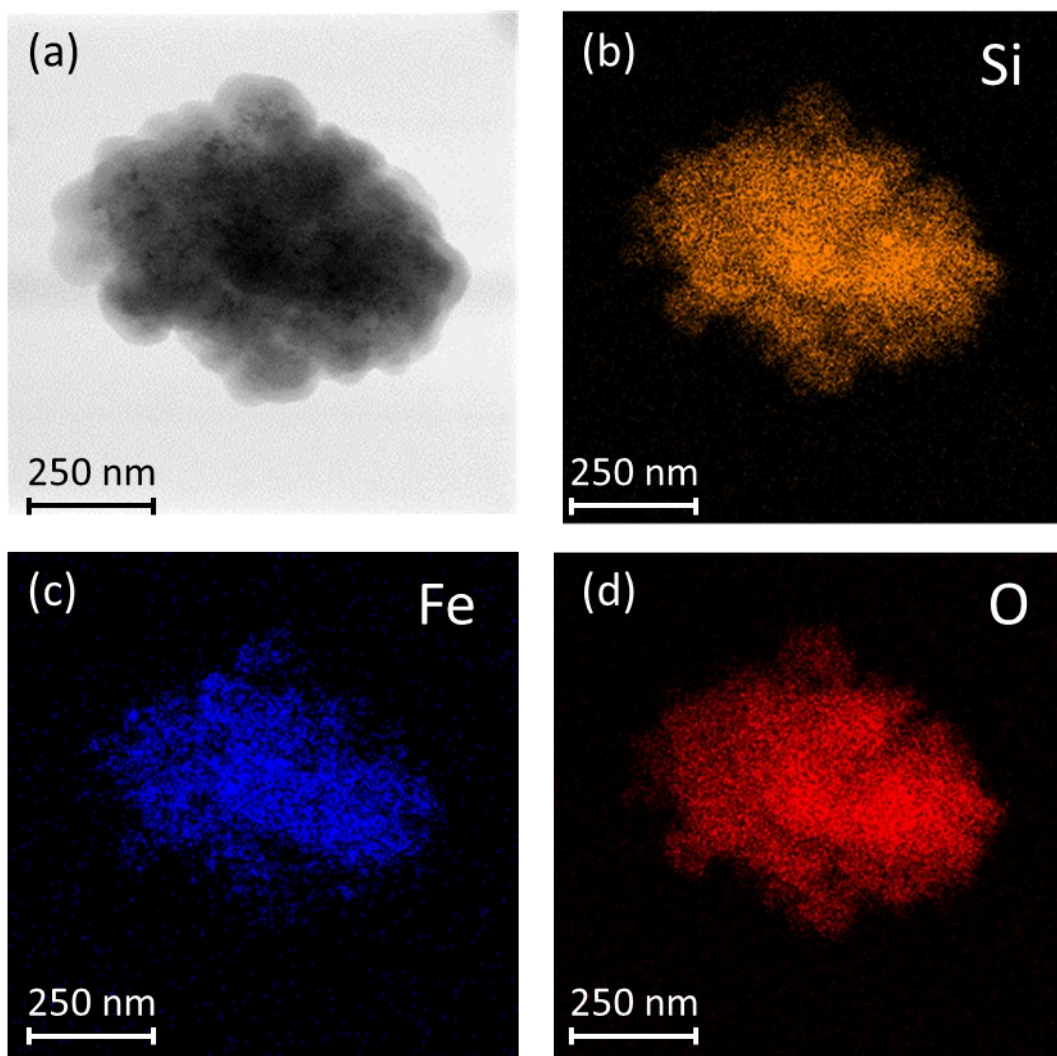

Figure S-3 STEM image and element maps of the (b) silicon (Si), (c) iron (Fe), and (d) oxygen (O) components in the used Fe/SiO<sub>2</sub> catalyst.

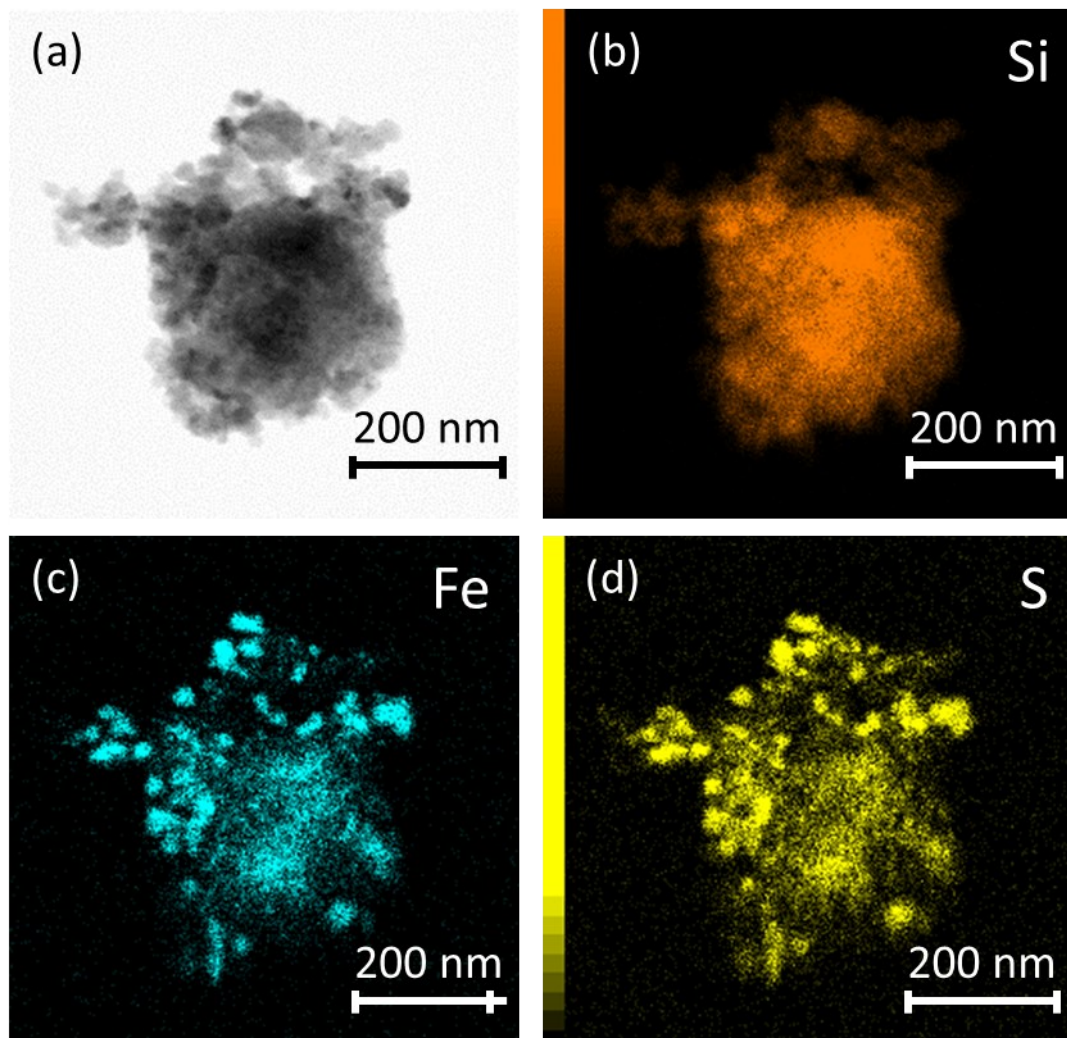

Supplement: d3nj04923j1.pdf [file d3nj04923j1.pdf]
